# Supplementary material for: Comprehensive proteomic profiling of plasma-derived Extracellular Vesicles from dementia with Lewy Bodies patients
Source: PubMed Central journal article supplement (PMC6746766; doi:10.1038/s41598-019-49668-y), 2019-09-16
Supplement: 41598_2019_49668_MOESM1_ESM.pdf [file 41598_2019_49668_MOESM1_ESM.pdf]

# **Comprehensive proteomic profiling of plasma-derived Extracellular Vesicles from dementia with Lewy Bodies patients**

Ana Gámez-Valero<sup>1, 2</sup>, Jaume Campdelacreu<sup>5</sup>, Ramón Reñé<sup>5</sup>, Katrin Beyer<sup>1†\*</sup> and Francesc E. Borràs<sup>2, 3, 4†\*</sup>

<sup>1</sup>Department of Pathology, Hospital Universitari and Health Sciences Research Institute Germans Trias i Pujol, Universitat Autònoma de Barcelona, Spain.

<sup>2</sup>REMAR-IVECAT group, Health Sciences Research Institute Germans Trias i Pujol, Badalona, Spain.

<sup>3</sup>Nephrology Service, Hospital Universitari Germans Trias i Pujol, Badalona, Spain.

<sup>4</sup>Department of Cell Biology, Physiology and Immunology, Universitat Autònoma de Barcelona (UAB), Barcelona, Spain.

<sup>5</sup>Department of Neurology, Hospital Universitari de Bellvitge, L'Hospitalet de Llobregat, Spain.

**†Both senior authors contributed equally.**

**\*Address correspondence to**

**Katrin Beyer**, PhD, Department of Pathology, Hospital Universitari Germans Trias i Pujol, 08916 Badalona, Barcelona, Spain. Phone: 00-34-93-497 88 53, e-mail: [katrinbeyer@hotmail.com](mailto:katrinbeyer@hotmail.com)

**Francesc E. Borràs**, PhD, REMAR-IVECAT group, Health Sciences Research Institute Germans Trias i Pujol, 08916 Badalona, Spain. Phone: 00-34-93-497 86 71, e-mail: [feborras@igtp.cat](mailto:feborras@igtp.cat)
